# Supplementary material for: Circulating tumour DNA in metastatic breast cancer to guide clinical trial enrolment and precision oncology: A cohort study
Source: PubMed Central journal article supplement (PMC7529214; doi:10.1371/journal.pmed.1003363), 2020-10-01
Supplement: pmed.1003363.s001.pdf [file pmed.1003363.s001.pdf]

| Section & Topic          | No  | Item                                                                                                                                                   | Reported on page #                       |
|--------------------------|-----|--------------------------------------------------------------------------------------------------------------------------------------------------------|------------------------------------------|
| <b>TITLE OR ABSTRACT</b> |     |                                                                                                                                                        |                                          |
|                          | 1   | Identification as a study of diagnostic accuracy using at least one measure of accuracy (such as sensitivity, specificity, predictive values, or AUC)  | Abstract, paragraph 2                    |
| <b>ABSTRACT</b>          |     |                                                                                                                                                        |                                          |
|                          | 2   | Structured summary of study design, methods, results, and conclusions (for specific guidance, see STARD for Abstracts)                                 | Abstract, paragraphs 1 to 4              |
| <b>INTRODUCTION</b>      |     |                                                                                                                                                        |                                          |
|                          | 3   | Scientific and clinical background, including the intended use and clinical role of the index test                                                     | Introduction, paragraphs 1 to 3          |
|                          | 4   | Study objectives and hypotheses                                                                                                                        | Introduction, paragraph 3                |
| <b>METHODS</b>           |     |                                                                                                                                                        |                                          |
| <i>Study design</i>      | 5   | Whether data collection was planned before the index test and reference standard were performed (prospective study) or after (retrospective study)     | Methods, paragraph 2                     |
| <i>Participants</i>      | 6   | Eligibility criteria                                                                                                                                   | Methods, paragraph 2                     |
|                          | 7   | On what basis potentially eligible participants were identified (such as symptoms, results from previous tests, inclusion in registry)                 | Methods, paragraph 2                     |
|                          | 8   | Where and when potentially eligible participants were identified (setting, location and dates)                                                         | Methods, paragraphs 1 and 2              |
|                          | 9   | Whether participants formed a consecutive, random or convenience series                                                                                | Methods, paragraph 2                     |
| <i>Test methods</i>      | 10a | Index test, in sufficient detail to allow replication                                                                                                  | Methods, paragraph 3                     |
|                          | 10b | Reference standard, in sufficient detail to allow replication                                                                                          | Supporting methods                       |
|                          | 11  | Rationale for choosing the reference standard (if alternatives exist)                                                                                  | Supporting methods                       |
|                          | 12a | Definition of and rationale for test positivity cut-offs or result categories of the index test, distinguishing pre-specified from exploratory         | Supporting methods                       |
|                          | 12b | Definition of and rationale for test positivity cut-offs or result categories of the reference standard, distinguishing pre-specified from exploratory | Supporting methods                       |
|                          | 13a | Whether clinical information and reference standard results were available to the performers/readers of the index test                                 | Supporting methods                       |
|                          | 13b | Whether clinical information and index test results were available to the assessors of the reference standard                                          | Supporting methods                       |
| <i>Analysis</i>          | 14  | Methods for estimating or comparing measures of diagnostic accuracy                                                                                    | Methods, paragraph 1, supporting methods |
|                          | 15  | How indeterminate index test or reference standard results were handled                                                                                | Supporting methods, and S2 figure        |
|                          | 16  | How missing data on the index test and reference standard were handled                                                                                 | Results, paragraphs 3 and 4              |
|                          | 17  | Any analyses of variability in diagnostic accuracy, distinguishing pre-specified from exploratory                                                      | Results, paragraph 4                     |
|                          | 18  | Intended sample size and how it was determined                                                                                                         | Methods, paragraph 1                     |
| <b>RESULTS</b>           |     |                                                                                                                                                        |                                          |
| <i>Participants</i>      | 19  | Flow of participants, using a diagram                                                                                                                  | Figure 1                                 |
|                          | 20  | Baseline demographic and clinical characteristics of participants                                                                                      | Results, paragraph 1 and Table 1         |
|                          | 21a | Distribution of severity of disease in those with the target condition                                                                                 | Results, paragraph 1 and Table 1         |
|                          | 21b | Distribution of alternative diagnoses in those without the target condition                                                                            | N/A                                      |
|                          | 22  | Time interval and any clinical interventions between index test and reference standard                                                                 | N/A                                      |

|                          |           |                                                                                                             |                                   |
|--------------------------|-----------|-------------------------------------------------------------------------------------------------------------|-----------------------------------|
| <i>Test results</i>      | <b>23</b> | Cross tabulation of the index test results (or their distribution) by the results of the reference standard | S3 Table                          |
|                          | <b>24</b> | Estimates of diagnostic accuracy and their precision (such as 95% confidence intervals)                     | Results, paragraphs 2 and 6       |
|                          | <b>25</b> | Any adverse events from performing the index test or the reference standard                                 | N/A                               |
| <b>DISCUSSION</b>        |           |                                                                                                             |                                   |
|                          | <b>26</b> | Study limitations, including sources of potential bias, statistical uncertainty, and generalisability       | Discussion, paragraph 5           |
|                          | <b>27</b> | Implications for practice, including the intended use and clinical role of the index test                   | Discussion, paragraphs 2, 3 and 4 |
| <b>OTHER INFORMATION</b> |           |                                                                                                             |                                   |
|                          | <b>28</b> | Registration number and name of registry                                                                    | Methods, paragraph 2              |
|                          | <b>29</b> | Where the full study protocol can be accessed                                                               | N/A                               |
|                          | <b>30</b> | Sources of funding and other support; role of funders                                                       | Funding                           |
