# Supplementary material for: Circulating tumour DNA in metastatic breast cancer to guide clinical trial enrolment and precision oncology: A cohort study
Source: PubMed Central journal article supplement (PMC7529214; doi:10.1371/journal.pmed.1003363), 2020-10-01

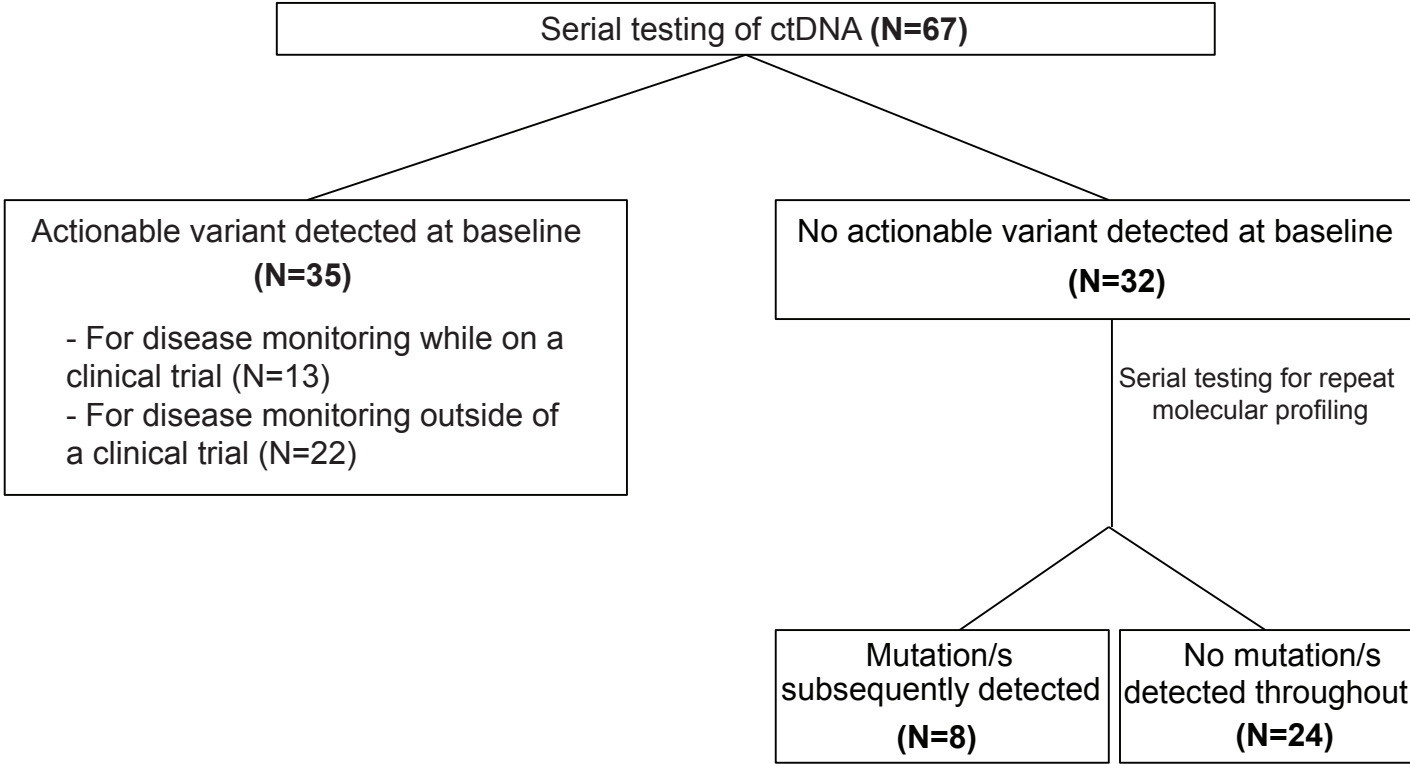

Supplement: pmed.1003363.s007.pdf [file pmed.1003363.s007.pdf]
