# Supplementary material for: Circulating tumour DNA in metastatic breast cancer to guide clinical trial enrolment and precision oncology: A cohort study
Source: PLoS Med. 2020 Oct 1;17(10):e1003363. doi: 10.1371/journal.pmed.1003363 (PMC7529214; doi:10.1371/journal.pmed.1003363)
Supplement: S6 Table — (XLSX) [file pmed.1003363.s015.xlsx]

## Sheet: S6 Table
S6 Table: Summary of why clinical management was unaffected in patients with actionable mutations detected
Patient ID	Genes with actionable mutations (baseline/serial testing)		Why clinical management was unaffected
	Detected at baseline	Detected during serial testing
MBCB005	PIK3CA		Lost to follow up
MBCB006	PIK3CA		Lost to follow up
MBCB009	AKT1		No clinical trial available at the time
MBCB015	PTEN		No clinical trial available at the time
MBCB018	ESR1		Lost to follow up
MBCB024	PIK3CA		Failed to meet clinical trial eligibility criteria
MBCB025	PTEN		No clinical trial available at the time
MBCB029	PIK3CA, ERBB2		Failed to meet clinical trial eligibility criteria
MBCB030	PIK3CA		Failed to meet clinical trial eligibility criteria
MBCB033	ESR1		Lost to follow up
MBCB034	PIK3CA		Lost to follow up
MBCB036	PTEN		No clinical trial available at the time
MBCB039	PIK3CA		Failed to meet clinical trial eligibility criteria
MBCB045	PIK3CA		Failed to meet clinical trial eligibility criteria
MBCB053		ESR1	Failed to meet clinical trial eligibility criteria
MBCB054	PIK3CA		Other treatment chosen (patient/clinician prerference)
MBCB055	AKT1		No clinical trial available at the time
MBCB056	ESR1, AKT1		Other treatment chosen (patient/clinician prerference)
MBCB057	PIK3CA		Other treatment chosen (patient/clinician prerference)
MBCB062	PIK3CA		No clinical trial available at the time
MBCB068		PIK3CA	Failed to meet clinical trial eligibility criteria
MBCB076	PTEN, CDKN2A		No clinical trial available at the time
MBCB078	PIK3CA		Failed to meet clinical trial eligibility criteria
MBCB081	ERBB2		No clinical trial available at the time
MBCB082	PIK3CA		Failed to meet clinical trial eligibility criteria
MBCB089	ESR1		Lost to follow up
MBCB091		PIK3CA	Failed to meet clinical trial eligibility criteria
MBCB095	PTEN		No clinical trial available at the time
MBCB098	ESR1, PIK3CA		Failed to meet clinical trial eligibility criteria
MBCB101	PIK3CA		Lost to follow up
MBCB104	ESR1		Lost to follow up
MBCB106	PIK3CA, PTEN		Failed to meet clinical trial eligibility criteria
MBCB110	PIK3CA		Failed to meet clinical trial eligibility criteria
MBCB120	CDKN2A		No clinical trial available at the time
MBCB131		ESR1	Lost to follow up
MBCB134	ESR1		Lost to follow up
MBCB136	AKT1		No clinical trial available at the time
MBCB138	PTEN		No clinical trial available at the time
MBCB143	PIK3CA		Lost to follow up
MBCB144		PIK3CA	Other treatment chosen (patient/clinician prerference)
MBCB149	ATM		No clinical trial available at the time
MBCB151	PTEN		No clinical trial available at the time
MBCB152		ESR1	Lost to follow up
MBCB153	CDKN2A		No clinical trial available at the time
MBCB159	ESR1		Lost to follow up
MBCB161	PIK3CA		Lost to follow up
MBCB168	PIK3CA		Lost to follow up
MBCB179	ERBB2		No clinical trial available at the time
MBCB185	PIK3CA		Failed to meet clinical trial eligibility criteria
MBCB194	AKT1		No clinical trial available at the time
MBCB198	AKT1		No clinical trial available at the time
MBCB205	ESR1		Lost to follow up
MBCB206	ESR1, PIK3CA		Lost to follow up
MBCB214	PIK3CA		Failed to meet clinical trial eligibility criteria
MBCB216	ESR1, PIK3CA		Lost to follow up
MBCB220	AKT1		No clinical trial available at the time
MBCB224	AKT1		No clinical trial available at the time
MBCB226	PIK3CA		Other treatment chosen (patient/clinician prerference)
MBCB249	AKT1		No clinical trial available at the time
MBCB251	PIK3CA		Other treatment chosen (patient/clinician prerference)
MBCB254	ESR1, PIK3CA		Lost to follow up
MBCB257	ESR1		Lost to follow up
MBCB259	PIK3CA		Other treatment chosen (patient/clinician prerference)
MBCB260	PIK3CA		Failed to meet clinical trial eligibility criteria
